# Supplementary material
Source: HighWire-hosted journal article supplement (https://erj.ersjournals.com/content/57/6/2004299)
Supplement: inline-supplementary-material-1 [file inline-supplementary-material-1.pdf]

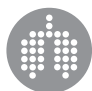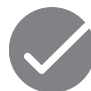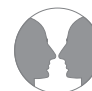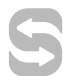

SHAREABLE PDF

# Fine particulate matter and out-of-hospital cardiac arrest of respiratory origin

Sunao Kojima<sup>1</sup>, Takehiro Michikawa<sup>2</sup>, Kunihiro Matsui<sup>3</sup>, Hisao Ogawa<sup>4</sup>, Shin Yamazaki<sup>5</sup>, Hiroshi Nitta<sup>5</sup>, Akinori Takami<sup>6</sup>, Kayo Ueda<sup>7</sup>, Yoshio Tahara<sup>8</sup>, Naohiro Yonemoto<sup>9</sup>, Hiroshi Nonogi<sup>10</sup>, Ken Nagao<sup>11</sup>, Takanori Ikeda<sup>12</sup> and Yoshio Kobayashi<sup>13</sup>, for the Japanese Circulation Society With Resuscitation Science Study (JCS-ReSS) Group

**Affiliations:** <sup>1</sup>Dept of General Internal Medicine 3, Kawasaki Medical School General Medical Center, Okayama, Japan. <sup>2</sup>Dept of Environmental and Occupational Health, School of Medicine, Toho University, Tokyo, Japan. <sup>3</sup>Dept of General Medicine, Kumamoto University Hospital, Kumamoto, Japan. <sup>4</sup>National Cerebral and Cardiovascular Center, Suita, Japan. <sup>5</sup>Centre for Health and Environmental Risk Research, National Institute for Environmental Studies, Tsukuba, Japan. <sup>6</sup>Centre for Regional Environmental Research, National Institute for Environmental Studies, Tsukuba, Japan. <sup>7</sup>Environmental Health Sciences, Kyoto University Graduate School of Global Environmental Studies, Kyoto, Japan. <sup>8</sup>Dept of Cardiovascular Medicine, National Cerebral and Cardiovascular Center, Suita, Japan. <sup>9</sup>Dept of Public Health, Juntendo University School of Medicine, Tokyo, Japan. <sup>10</sup>Faculty of Health Science, Osaka Aoyama University, Mino, Japan. <sup>11</sup>Dept of Cardiovascular Center, Nihon University Hospital, Tokyo, Japan. <sup>12</sup>Dept of Cardiovascular Medicine, Toho University Faculty of Medicine, Tokyo, Japan. <sup>13</sup>Dept of Cardiovascular Medicine, Chiba University Graduate School of Medicine, Chiba, Japan.

**Correspondence:** Sunao Kojima, Dept of General Internal Medicine 3, Kawasaki Medical School General Medical Centre, 2-6-1 Nakasange, Kita-ku, Okayama 700-8505, Japan. E-mail: kojimas@med.kawasaki-m.ac.jp

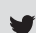

@ERSpublications

**Particulate matter is a potential risk factor for out-of-hospital cardiac arrests (OHCAs) of respiratory origin. The percent increase in incidence of OHCA of respiratory origin is equivalent to that of PM<sub>2.5</sub> exposure-related OHCAs of cardiac origin.** <http://bit.ly/3tDXym0>

**Cite this article as:** Kojima S, Michikawa T, Matsui K, *et al.* Fine particulate matter and out-of-hospital cardiac arrest of respiratory origin. *Eur Respir J* 2021; 57: 2004299 [https://doi.org/10.1183/13993003.04299-2020].

This single-page version can be shared freely online.

## To the Editor:

Exposure to ambient air pollution increases mortality and is a leading contributor to the global disease burden [1]. Epidemiological studies have elucidated a relationship between out-of-hospital cardiac arrests (OHCAs) and air pollutants, especially particulate matter (diameter  $\leq 2.5$   $\mu\text{m}$ ; PM<sub>2.5</sub>) [2, 3]. The causes of OHCA are broadly categorised as cardiac and non-cardiac [4]. A 10  $\mu\text{g}\cdot\text{m}^{-3}$  increase in PM<sub>2.5</sub> exposure yielded a 1.6% increase in the incidence of cardiac origin OHCA [3, 5]. However, few studies on OHCAs of non-cardiac origin, including intrinsic respiratory diseases (COPD/pneumonia/asthma) are available. We examined the association between short-term exposure to PM<sub>2.5</sub> and bystander-witnessed respiratory origin OHCAs, including eventual prognosis. We also investigated differences between PM<sub>2.5</sub> exposure-related cardiac and respiratory origin OHCAs.
